# Supplementary material
Source: PubMed Central journal article supplement (PMC3595997)
Supplement: NIHMS51877-supplement-supp_tables.pdf [file NIHMS51877-supplement-supp_tables.pdf]

Table S1. List of Drosha-Associated ERV Sequences Identified by ChIP-seq, Related to Figure 5A

| Class     | Family    | Repeat      | # tags Drosha | # tags Input | Relative Fold Change | Chi <sup>2</sup> test – P-value |
|-----------|-----------|-------------|---------------|--------------|----------------------|---------------------------------|
| LTR       | ERV3      | MER74C      | 19            | 3            | 6.65                 | 9E-4                            |
| Satellite |           | GGAAT-SAT   | 75883         | 12233        | 6.51                 | 0                               |
| LTR       | ERV3      | MER74A      | 128           | 33           | 4.07                 | 1E-14                           |
| LTR       | ERV1      | LTR35       | 41            | 12           | 3.59                 | 6E-5                            |
| LTR       | ERV3      | LTR7A       | 4377          | 1622         | 2.83                 | 2E-306                          |
| LTR       | ERV1      | LTR35A      | 60            | 23           | 2.74                 | 3E-5                            |
| LTR       | ERV3      | MER74       | 44            | 17           | 2.72                 | 4E-4                            |
| LTR       | ERV3      | MER73       | 64            | 25           | 2.69                 | 2E-5                            |
| LTR       | ERV1      | LTR1F2      | 195           | 79           | 2.59                 | 2E-13                           |
| LTR       | ERV1      | MER67A      | 49            | 20           | 2.57                 | 3E-4                            |
| LTR       | ERV1      | LTR27       | 198           | 81           | 2.57                 | 2E-13                           |
| LTR       | ERV3      | MER74B      | 56            | 23           | 2.56                 | 1E-4                            |
| LTR       | ERV3      | LTR7C       | 434           | 187          | 2.44                 | 1E-25                           |
| LTR       | ERV1      | MER57E1     | 39            | 17           | 2.41                 | 3E-3                            |
| LTR       | ERV3      | LTR19A      | 377           | 174          | 2.27                 | 4E-20                           |
| LTR       | ERV3      | LTR7B       | 3587          | 1672         | 2.25                 | 2E-174                          |
| LTR       | ERV3      | LTR7Y       | 2847          | 1348         | 2.22                 | 9E-135                          |
| LTR       | ERV1      | MER31B      | 48            | 23           | 2.19                 | 2E-3                            |
| MuDr      | RICKSHA_0 | RICKSHA_0   | 48            | 23           | 2.19                 | 2E-3                            |
| LTR       | ERV1      | HERVFH21I   | 1108          | 539          | 2.16                 | 8E-51                           |
| LTR       | ERV1      | LTR27D      | 116           | 57           | 2.14                 | 2E-6                            |
| LTR       | ERV1      | LTR28C      | 231           | 115          | 2.11                 | 3E-11                           |
| LTR       | ERV1      | LTR1F       | 110           | 55           | 2.10                 | 6E-6                            |
| LTR       | ERV1      | LTR1E       | 210           | 108          | 2.04                 | 1E-9                            |
| LTR       | ERV1      | LTR28       | 138           | 71           | 2.04                 | 9E-7                            |
| LTR       | ERV       | HERV46I     | 378           | 199          | 1.99                 | 1E-15                           |
| LINE      | L1        | L1M2A1_5-L1 | 123           | 66           | 1.96                 | 1E-5                            |
| LTR       | ERV1      | LTR1D       | 344           | 187          | 1.93                 | 2E-13                           |
| LTR       | ERV1      | HERVH       | 30537         | 16663        | 1.92                 | 0                               |
| LTR       | ERV       | HERVFH19I   | 694           | 385          | 1.89                 | 2E-24                           |
| LTR       | ERV1      | LTR1D1      | 207           | 117          | 1.86                 | 7E-8                            |
| LTR       | ERV1      | LTR46       | 70            | 40           | 1.84                 | 2E-3                            |
| LINE      | L1        | L1M2A_5-L1  | 145           | 83           | 1.83                 | 1E-5                            |
| LTR       | ERV1      | LTR45C      | 116           | 67           | 1.82                 | 1E-4                            |
| LTR       | ERV2      | LTR22B1     | 123           | 72           | 1.79                 | 9E-5                            |
| LTR       | ERV       | HERVH48I    | 1935          | 1140         | 1.78                 | 2E-55                           |
| LTR       | ERV1      | LTR10B      | 83            | 49           | 1.78                 | 2E-3                            |
| LTR       | ERV1      | LTR1B       | 373           | 227          | 1.72                 | 7E-11                           |
| LTR       | ERV3      | MLT2C2      | 121           | 77           | 1.65                 | 7E-4                            |
| LINE      | L1        | L1PBB_5-L1  | 102           | 65           | 1.65                 | 2E-3                            |
| LTR       | ERV1      | HERVIP10FH  | 1514          | 983          | 1.62                 | 3E-32                           |
| LTR       | ERV2      | MER9        | 3613          | 2379         | 1.59                 | 5E-71                           |
| LTR       | ERV3      | MSTC        | 868           | 586          | 1.55                 | 1E-16                           |
| LTR       | ERV1      | LTR1B0      | 145           | 98           | 1.55                 | 9E-4                            |
| LTR       | ERV1      | MER31A      | 283           | 192          | 1.55                 | 3E-6                            |
| LTR       | ERV2      | MER11D      | 1676          | 1140         | 1.54                 | 5E-30                           |
| LTR       | ERV       | HERVP71A_I  | 1007          | 685          | 1.54                 | 1E-18                           |

|                       |         |
|-----------------------|---------|
| #Tags Drosha Library: | 1093924 |
| #Tags Input Library:  | 1148058 |

Table S2. List of Drosha-Associated Genes Identified by ChIP-seq, Related to Figure 5D

| GeneID    | SYMBOL | GeneID     | SYMBOL | GeneID   | SYMBOL | GeneID   | SYMBOL |
|-----------|--------|------------|--------|----------|--------|----------|--------|
| AACS      | 65985  | BCAM       | 4059   | CNTNAP2  | 26047  | EMX2     | 2018   |
| ABCA13    | 154664 | BCAS3      | 54828  | CNTNAP5  | 129684 | EPHA10   | 284656 |
| ABCG1     | 9619   | BCL9       | 607    | COL13A1  | 1305   | EPHA2    | 1969   |
| ACOX1     | 51     | BPI        | 671    | COL15A1  | 1306   | EPHB2    | 2048   |
| ADAM12    | 8038   | BPIFB4     | 149954 | COL18A1  | 80781  | ERC2     | 26059  |
| ADAMTS12  | 81792  | C10orf11   | 83938  | COL22A1  | 169044 | EVC2     | 132884 |
| ADAMTS16  | 170690 | C11orf24   | 53838  | COL23A1  | 91522  | EXOC4    | 60412  |
| ADARB2    | 105    | C11orf41   | 25758  | COL5A1   | 1289   | FAM101A  | 144347 |
| ADCK3     | 56997  | C12orf4    | 57102  | COL6A2   | 1292   | FAM135B  | 51059  |
| ADCY1     | 107    | C12orf57   | 113246 | COPA     | 1314   | FAM157A  | 728262 |
| ADORA2B   | 136    | C14orf166B | 145497 | CPAMD8   | 27151  | FAM168A  | 23201  |
| AFAP1     | 60312  | C17orf70   | 80233  | CPM      | 1368   | FAM169B  | 283777 |
| AFF3      | 3899   | C1orf228   | 339541 | CPNE9    | 151835 | FAM188B  | 84182  |
| AGAP1     | 116987 | C1QB       | 713    | CPT1C    | 126129 | FAM189A1 | 23359  |
| AGBL4     | 84871  | C21orf58   | 54058  | CREM     | 1390   | FAM24A   | 118670 |
| AGTPBP1   | 23287  | C22orf34   | 348645 | CRHR2    | 1395   | FAM3D    | 131177 |
| AHRR      | 57491  | C9orf96    | 169436 | CTNND2   | 1501   | FAM70B   | 348013 |
| AK4       | 205    | CA10       | 56934  | CUX2     | 23316  | FAT1     | 2195   |
| AKNA      | 80709  | CABP1      | 9478   | CWF19L1  | 55280  | FAT3     | 120114 |
| ALK       | 238    | CACNA1A    | 773    | DAB1     | 1600   | FBLN1    | 2192   |
| ALOX5     | 240    | CACNA1I    | 8911   | DCLK1    | 9201   | FBLN2    | 2199   |
| ALX4      | 60529  | CACNA2D3   | 55799  | DDAH1    | 23576  | FBN3     | 84467  |
| AMOTL1    | 154810 | CACNG2     | 10369  | DEFB119  | 245932 | FBRSL1   | 57666  |
| ANKMY1    | 51281  | CAMK1G     | 57172  | DENND5B  | 160518 | FCER2    | 2208   |
| ANKRD24   | 170961 | CAMTA1     | 23261  | DHCR7    | 1717   | FER      | 2241   |
| ANO1      | 55107  | CAPZA2     | 830    | DHRS3    | 9249   | FGD3     | 89846  |
| ANO4      | 121601 | CARD6      | 84674  | DISC1    | 27185  | FGF3     | 2248   |
| ARHGAP22  | 58504  | CCBL2      | 56267  | DLEC1    | 9940   | FIG4     | 9896   |
| ARHGAP6   | 395    | CCDC114    | 93233  | DLG2     | 1740   | FLRT1    | 23769  |
| ARHGEF10L | 55160  | CCDC57     | 284001 | DLGAP1   | 9229   | FLT4     | 2324   |
| ARMC2     | 84071  | CD46       | 4179   | DNAH9    | 1770   | FRMPD2   | 143162 |
| ASAP2     | 8853   | CDKAL1     | 54901  | DNASE1L1 | 1774   | FRY      | 10129  |
| ASS1      | 445    | CELF2      | 10659  | DOCK6    | 57572  | FYB      | 2533   |
| ATAD5     | 79915  | CELF4      | 56853  | DSCR4    | 10281  | GABBR2   | 9568   |
| ATCAY     | 85300  | CELF5      | 60680  | DYSF     | 8291   | GABRR3   | 200959 |
| ATF6      | 22926  | CELSR1     | 9620   | E2F6     | 1876   | GALNTL4  | 374378 |
| ATG4C     | 84938  | CERS4      | 79603  | EEF1A2   | 1917   | GAS6     | 2621   |
| ATN1      | 1822   | CHD5       | 26038  | EFCAB1   | 79645  | GAS7     | 8522   |
| ATP10B    | 23120  | CHD6       | 84181  | EFCAB6   | 64800  | GHRHR    | 2692   |
| ATXN1     | 6310   | CHST8      | 64377  | EIF2C2   | 27161  | GLIPR2   | 152007 |
| ATXN7L1   | 222255 | CLCA4      | 22802  | EIF3A    | 8661   | GLRA1    | 2741   |
| AUTS2     | 26053  | CLEC17A    | 388512 | ELL      | 8178   | GLTSCR1  | 29998  |
| AXL       | 558    | CLTC       | 1213   | ELN      | 2006   | GMDS     | 2762   |
| BAI1      | 575    | CNTLN      | 54875  | EMID2    | 136227 | GNA15    | 2769   |

| GeneID   | SYMBOL |
|----------|--------|
| GNG7     | 2788   |
| GOLGA1   | 2800   |
| GOLM1    | 51280  |
| GPR133   | 283383 |
| GPR173   | 54328  |
| GPR68    | 8111   |
| GRAMD4   | 23151  |
| GRB10    | 2887   |
| GRIK3    | 2899   |
| HHAT     | 55733  |
| HIF3A    | 64344  |
| HIST1H1C | 3006   |
| HIVEP3   | 59269  |
| HNF1A    | 6927   |
| HSD11B1L | 374875 |
| HSF2BP   | 11077  |
| HTRA3    | 94031  |
| ICA1     | 3382   |
| IER2     | 9592   |
| IGHE     | 3497   |
| IGSF21   | 84966  |
| IL12RB1  | 3594   |
| IL12RB2  | 3595   |
| IL2RA    | 3559   |
| INMT     | 11185  |
| INSR     | 3643   |
| IPCEF1   | 26034  |
| ITGA11   | 22801  |
| ITIH3    | 3699   |
| JAKMIP1  | 152789 |
| JAKMIP3  | 282973 |
| JPH2     | 57158  |
| KCNB1    | 3745   |
| KCNK9    | 51305  |
| KCNQ1    | 3784   |
| KCNQ3    | 3786   |
| KCNS3    | 3790   |
| KDM4B    | 23030  |
| KIAA0284 | 283638 |
| KIAA0319 | 9856   |
| KIAA1024 | 23251  |
| KIF17    | 57576  |
| KLHL26   | 55295  |
| KLK13    | 26085  |

| GeneID    | SYMBOL |
|-----------|--------|
| KLK15     | 55554  |
| KLK5      | 25818  |
| KNDC1     | 85442  |
| KRT77     | 374454 |
| KSR1      | 8844   |
| KSR2      | 283455 |
| LGI4      | 163175 |
| LINC00111 | 54090  |
| LMNB2     | 84823  |
| LMX1B     | 4010   |
| LOXHD1    | 125336 |
| LRRC2     | 79442  |
| LRRC27    | 80313  |
| LRRK1     | 79705  |
| MACROD1   | 28992  |
| MAG       | 4099   |
| MASP2     | 10747  |
| MBP       | 4155   |
| MCF2L     | 23263  |
| MGLL      | 11343  |
| MIER1     | 57708  |
| MLPH      | 79083  |
| MLXIPL    | 51085  |
| MOB3B     | 79817  |
| MPZL1     | 9019   |
| MSH4      | 4438   |
| MUC16     | 94025  |
| MUC2      | 4583   |
| MUC4      | 4585   |
| MYBPC2    | 4606   |
| MYCBPAP   | 84073  |
| MYH14     | 79784  |
| MYO18A    | 399687 |
| MYO18B    | 84700  |
| MYO1F     | 4542   |
| MYO1H     | 283446 |
| MYO7A     | 4647   |
| MYO7B     | 4648   |
| MYO9B     | 4650   |
| MYT1L     | 23040  |
| NCOR1     | 9611   |
| NCOR2     | 9612   |
| NEAT1     | 283131 |
| NEGR1     | 257194 |

| GeneID   | SYMBOL |
|----------|--------|
| NFATC1   | 4772   |
| NIPAL2   | 79815  |
| NLK      | 51701  |
| NOS1     | 4842   |
| NOS3     | 4846   |
| NPAS4    | 266743 |
| NPHS1    | 4868   |
| NSUN6    | 221078 |
| NUCB1    | 4924   |
| NUP88    | 4927   |
| NWD1     | 284434 |
| OBSCN    | 84033  |
| ODF3L2   | 284451 |
| OSBPL5   | 114879 |
| OTOF     | 9381   |
| OTUD7A   | 161725 |
| OTUD7B   | 56957  |
| OXCT1    | 5019   |
| PALLD    | 23022  |
| PARVG    | 64098  |
| PAX4     | 5078   |
| PBX1     | 5087   |
| PCBP2    | 5094   |
| PDE4B    | 5142   |
| PDE9A    | 5152   |
| PDZK1IP1 | 10158  |
| PEBP4    | 157310 |
| PEPD     | 5184   |
| PEX12    | 5193   |
| PEX5L    | 51555  |
| PHACTR1  | 221692 |
| PHACTR3  | 116154 |
| PHF2     | 5253   |
| PITPNM3  | 83394  |
| PLBD2    | 196463 |
| PLVAP    | 83483  |
| PLXNA4   | 91584  |
| PMS2P11  | 441263 |
| PNPLA7   | 375775 |
| PPP6R2   | 9701   |
| PQLC1    | 80148  |
| PREX1    | 57580  |
| PRIMA1   | 145270 |
| PRKAG2   | 51422  |

| GeneID   | SYMBOL |
|----------|--------|
| PRKAR1B  | 5575   |
| PRKCQ    | 5588   |
| PRKCZ    | 5590   |
| PRLR     | 5618   |
| PRR12    | 57479  |
| PSAT1    | 29968  |
| PSD2     | 84249  |
| PSTPIP1  | 9051   |
| PTGIS    | 5740   |
| PTP4A1   | 7803   |
| PXDN     | 7837   |
| RAB8A    | 4218   |
| RABGGTB  | 5876   |
| RALGPS1  | 9649   |
| RANBP9   | 10048  |
| RARB     | 5915   |
| RASA3    | 22821  |
| RELN     | 5649   |
| RET      | 5979   |
| RFX2     | 5990   |
| RIMS4    | 140730 |
| RIN2     | 54453  |
| RIN3     | 79890  |
| RNF144A  | 9781   |
| RNF213   | 57674  |
| RNFT2    | 84900  |
| RNU11    | 26824  |
| ROR1     | 4919   |
| RPL10    | 6134   |
| RPL27A   | 6157   |
| RPL41    | 6171   |
| RPS6     | 6194   |
| RTBDN    | 83546  |
| SAE1     | 10055  |
| SAMD5    | 389432 |
| SDHC     | 6391   |
| SDK1     | 221935 |
| SEC14L3  | 266629 |
| SEC22A   | 26984  |
| SEMA6B   | 10501  |
| SERINC2  | 347735 |
| SERPINA5 | 5104   |
| SERPINB1 | 1992   |
| SFMBT2   | 57713  |

| GeneID   | SYMBOL    |
|----------|-----------|
| SFT2D2   | 375035    |
| SH3PXD2A | 9644      |
| SH3TC1   | 54436     |
| SHANK3   | 85358     |
| SHC2     | 25759     |
| SHC3     | 53358     |
| SHISA6   | 388336    |
| SHROOM2  | 357       |
| SIN3B    | 23309     |
| SLC10A7  | 84068     |
| SLC13A2  | 9058      |
| SLC22A12 | 116085    |
| SLC2A10  | 81031     |
| SLC30A7  | 148867    |
| SLC39A11 | 201266    |
| SLC44A3  | 126969    |
| SLC44A5  | 204962    |
| SLC6A11  | 6538      |
| SLC6A17  | 388662    |
| SLC6A3   | 6531      |
| SLC9A3   | 6550      |
| SLC9A9   | 285195    |
| SLCO3A1  | 28232     |
| SLFN12L  | 100506736 |
| SMOC1    | 64093     |
| SMOC2    | 64094     |
| SNORD7   | 692076    |
| SORCS3   | 22986     |
| SPAG9    | 9043      |
| SPECC1   | 92521     |
| SPEF2    | 79925     |
| SPTBN4   | 57731     |
| SRGAP3   | 9901      |
| SRRM4    | 84530     |
| SSH2     | 85464     |
| SSPO     | 23145     |
| SST      | 6750      |
| ST8SIA5  | 29906     |
| STAB2    | 55576     |
| STAP2    | 55620     |
| STK10    | 6793      |
| STX8     | 9482      |
| SUSD4    | 55061     |
| SV2C     | 22987     |

| GeneID    | SYMBOL |
|-----------|--------|
| SYN3      | 8224   |
| SYNJ2     | 8871   |
| SYT2      | 127833 |
| TAF4      | 6874   |
| TBCD      | 6904   |
| TBX5      | 6910   |
| TEKT1     | 83659  |
| TERT      | 7015   |
| TEX14     | 56155  |
| TG        | 7038   |
| THBS2     | 7058   |
| THOP1     | 7064   |
| TMEM108   | 66000  |
| TMEM132B  | 114795 |
| TMEM132D  | 121256 |
| TMEM146   | 257062 |
| TMEM211   | 255349 |
| TMEM56    | 148534 |
| TMEM72    | 643236 |
| TMPRSS6   | 164656 |
| TNFRSF13B | 23495  |
| TNFRSF8   | 943    |
| TNXB      | 7148   |
| TP73      | 7161   |
| TRAPPC9   | 83696  |
| TRIM37    | 4591   |
| TRIO      | 7204   |
| TRPM4     | 54795  |
| TSHZ2     | 128553 |
| TSHZ3     | 57616  |
| TSNARE1   | 203062 |
| TSSC1     | 7260   |
| TTC7A     | 57217  |
| TTLL3     | 26140  |
| TUBGCP6   | 85378  |
| UBE2G1    | 7326   |
| UMODL1    | 89766  |
| UNC13A    | 23025  |
| UNC5A     | 90249  |
| USH2A     | 7399   |
| VAV1      | 7409   |
| VAV2      | 7410   |
| VEZF1     | 7716   |
| VIPR1     | 7433   |

| GeneID   | SYMBOL |
|----------|--------|
| VIPR2    | 7434   |
| VRK3     | 51231  |
| VSTM2B   | 342865 |
| VTRNA1-3 | 56662  |
| WAS      | 7454   |
| WDR27    | 253769 |
| WDR85    | 92715  |
| WISP1    | 8840   |
| WNT3A    | 89780  |
| WNT7B    | 7477   |
| WSCD1    | 23302  |
| WSCD2    | 9671   |
| XKR7     | 343702 |
| YIF1B    | 90522  |
| ZAN      | 7455   |
| ZC3H10   | 84872  |
| ZFP3     | 124961 |
| ZFYVE28  | 57732  |
| ZNF17    | 7565   |
| ZNF454   | 285676 |
| ZZZ3     | 26009  |
